# Supplementary material for: circ_2858 Helps Blood-Brain Barrier Disruption by Increasing VEGFA via Sponging miR-93-5p during Escherichia coli Meningitis
Source: PubMed Central journal article supplement — Mol Ther Nucleic Acids. 2020 Oct 4;22:708–21. doi: 10.1016/j.omtn.2020.09.034 (PMC7593508; doi:10.1016/j.omtn.2020.09.034), 2020-10-04
Supplement: mmc1.pdf [file mmc1.pdf]

OMTN, Volume 22

## Supplemental Information

**circ\_2858 Helps Blood-Brain Barrier Disruption  
by Increasing VEGFA via Sponging miR-93-5p  
during *Escherichia coli* Meningitis**

**Ruicheng Yang, Jiaqi Chen, Bojie Xu, Bo Yang, Jiyang Fu, Siyu Xiao, Chen Tan, Huanchun Chen, and Xiangru Wang**

## Supplementary Figures

**Figure S1**

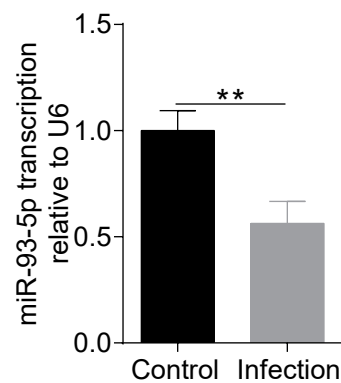

**Figure S1.** Meningitic *E. coli* infection decreased the transcription of miR-93-5p in hBMECs. U6 was used as the internal reference, and data were presented as mean  $\pm$  SD from three independent experiments.

**Figure S2**

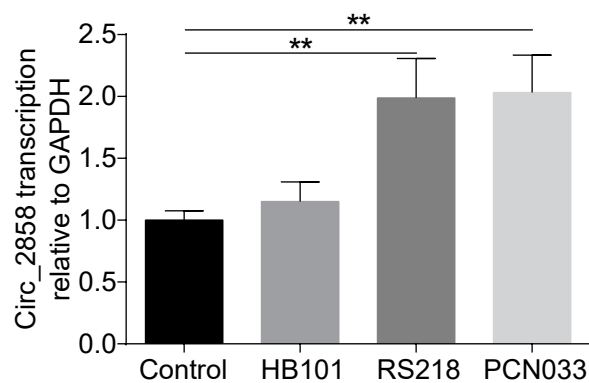

**Figure S2.** The alteration of circ\_2858 in hBMECs by the challenge of meningitic *E. coli* strain RS218 and PCN033, and the non-meningitic *E. coli* strain HB101. GAPDH was used as the internal reference, and data were presented as mean  $\pm$  SD from three independent experiments.

**Figure S3**

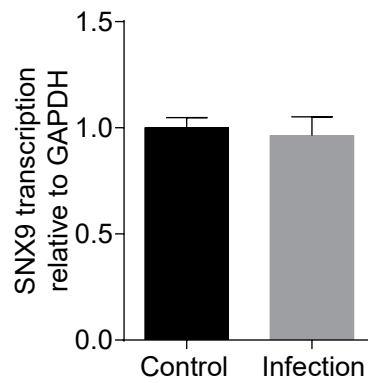

**Figure S3.** The transcription of SNX9 in hBMECs upon meningitic *E. coli* infection. GAPDH was used as the internal reference, and data were presented as mean  $\pm$  SD from three independent experiments.

**Figure S4**

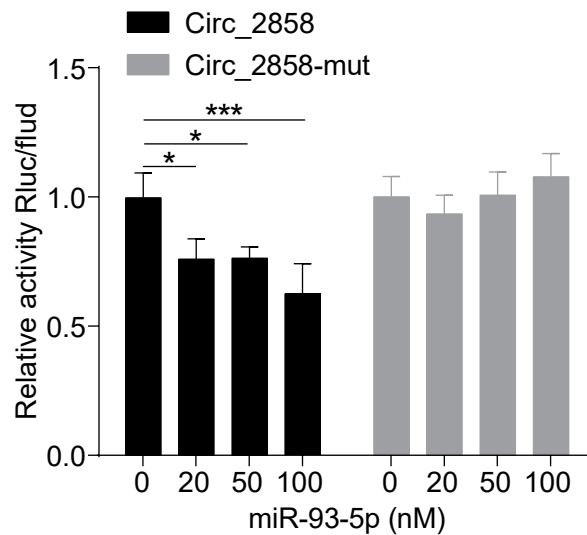

**Figure S4.** Dual-luciferase reporter assays showing that miR-93-5p significantly and dose-dependently reduced the luciferase activity of the wild-type circ\_2858 construct, but not that of the mutant construct. The renilla luciferase activity was normalized to the firefly luciferase activity, and data were presented as mean  $\pm$  SD from three independent experiments.

Tables S1 - S3 are submitted as Excel files and can be downloaded as separate files.

Table S4. Primers used for circRNAs real-time PCR

| Primers | Nucleotide sequence (5'-3') | Amplified fragments |
|---------|-----------------------------|---------------------|
| P1      | TAGTGAGGATGAGGAGGAAGA       | hsa_circ_851        |
| P2      | TTTAAGGGTGGGCTGATGT         |                     |
| P3      | AGTCCTCAGTCCTCAGTCATC       | hsa_circ_1291       |
| P4      | CCTGCTGTTGGGAAGTTTCA        |                     |
| P5      | GTTCCCTCCTTCCAGACCAT        | hsa_circ_1507       |
| P6      | CCAACAACAAGTTCATCATCCA      |                     |
| P7      | GTGACTTACCAGGGAAACT         | hsa_circ_1647       |
| P8      | AGCAAAGTGTGGGTCTTTA         |                     |
| P9      | GCGGAAGTCCTAAACAAGCATAGT    | hsa_circ_1687       |
| P10     | CTCAAAGCGATTGCCTCCTCTT      |                     |
| P11     | CAACATTGAGCGTGAGTG          | hsa_circ_1715       |
| P12     | AATAGCAGGTTCTTGATTGG        |                     |
| P13     | TGAGGACTCGCTGATTCTTGAGA     | hsa_circ_1910       |
| P14     | ACTTCCATTACCACTCCCTTCAGA    |                     |
| P15     | GCGGTAGATGATGATGATGAAG      | hsa_circ_2146       |
| P16     | CAAATCTGCGTGGTTCTCTT        |                     |
| P17     | GCTAACACCTACTAACACTAATCG    | hsa_circ_2858       |
| P18     | ACTGCCAACCTGTGACTT          |                     |
| P19     | GAAATGTGAAGCCAGGTTTA        | hsa_circ_3196       |
| P20     | CTTGTCAGGTTGTAAGC           |                     |
| P21     | GATATGGCTCAGACTCAGT         | hsa_circ_3779       |
| P22     | TCCGAAGGTCATCAACTAAT        |                     |
| P23     | ACTAATCTTCGGGCAGAG          | hsa_circ_4316       |
| P24     | TCCTGTCATCCTTCTTACG         |                     |
| P25     | CCAGACAAAGTAACAGAGATTC      | hsa_circ_5804       |
| P26     | AAGTTTGGAGTAGTGATTGC        |                     |
| P27     | TGCCTCCTGCACCACCAACT        | GAPDH               |
| P28     | CGCCTGCTTCACCACCTTC         |                     |

Table S5. Primers used for hsa\_circ\_2858 identification

| Primers | Nucleotide sequence (5'-3') | Produce size | Target product                |
|---------|-----------------------------|--------------|-------------------------------|
| P1      | GCTAACACCTACTAACACTAATCG    | 140 bp       | Exon 1 and 5 divergent primer |
| P2      | ACTGCCAACCTGTGACTT          |              |                               |
| P3      | AACTGGTGATGATGATGACT        | 123 bp       | Exon 2 convergent primer      |
| P4      | GAGGAACTAGCACGACTG          |              |                               |
| P5      | CACAGGTATAAGCACTTTGA        | 393 bp       | Exon 2 and 5 divergent primer |
| P6      | GAGGAACTAGCACGACTG          |              |                               |
| P7      | CAGTCGTGCTAGTTCCTC          | 564 bp       | Exon 2 divergent primer       |
| P8      | AGTCATCATCATCACCAGTT        |              |                               |
| P9      | CCATTCCAATCCCTTCTCT         | 612 bp       | Exon 5 divergent primer       |
| P10     | GTCAAAGTGCTTATACCTGTG       |              |                               |

Table S6. Primers used for miRNAs real-time PCR

| Primers | Nucleotide sequence (5'-3') | Amplified fragments |
|---------|-----------------------------|---------------------|
| P1      | TCAGTGCACTACAGAACTTTGT      | hsa-miR-148a-3p     |
| P2      | CTAGACTGAAGCTCCTTGAGG       | hsa-miR-151a-3p     |
| P3      | CAACAAAATCACTAGTCTTCCA      | hsa-miR-3529-3p     |
| P4      | TGGAAGACTAGTGATTTTGTGT      | hsa-miR-7-5p        |
| P5      | AGGGCTTAGCTGCTTGTGA         | hsa-miR-27a-5p      |
| P6      | CATCTTACCGGACAGTGCT         | hsa-miR-200a-5p     |
| P7      | AAGTGCTGTTCGTGCAGGTA        | hsa-miR-93-5p       |
| P8      | CTGAGACCCTTTAACTGTGA        | hsa-miR-125a-5p     |
| P9      | TAAAGTGCTTATAGTGCAGGTAG     | hsa-miR-20a-5p      |
| P10     | ACGGAATCCCAAAGCAGCT         | hsa-miR-191-5p      |
| P11     | CGGATATAATAACAACCTGCTAAGTG  | hsa-miR-374b-5p     |
| P12     | CGGCACTTAGCAGGTTGTATTATAT   | hsa-miR-374c-3p     |
| P13     | CTAAGGAAGTCCTGTGCTCAG       | hsa-miR-4521        |
| P14     | CAAAGTGCTTACAGTGCAGGTA      | hsa-miR-17-5p       |
| P15     | GCAGTGAAGTTCAGACGTC         | hsa-miR-2682-5p     |
| P16     | TAGCAGCACGTAAATATTGGC       | hsa-miR-16-5p       |
| P17     | TACCCATTGCATATCGGAGTTG      | hsa-miR-660-5p      |
| P18     | GGTTATTGCTTAAGAATACGCGTAG   | hsa-miR-137         |
| P19     | TGAGAACCACGTCTGCTCT         | hsa-miR-589-5p      |
| P20     | AGGCAAGATGCTGGCATA          | hsa-miR-31-5p       |
| P21     | CAGCATTGTACAGGGCTATCA       | hsa-miR-107         |
| P22     | TGTCCTCCAGGAGCTCAC          | hsa-miR-339-5p      |
| P23     | CCAAAAGTGCAGTTACTTTTGC      | hsa-miR-548o-3p     |
| P24     | GTGCAAATCCATGCAAACTG        | hsa-miR-19b-3p      |
| P25     | TGAAGCGCCTGTGCTCTG          | hsa-miR-7706        |
| P26     | CCTCCCACACCCAAGGCTTGCA      | hsa-miR-532-3p      |
| P27     | TAACAGCAACTCCATGTGGA        | hsa-miR-194-5p      |
| P28     | GCACCTGGGCAAGGATTCA         | hsa-miR-502-3p      |
| P29     | CCGGCCTAATTTTATGTATAAGC     | hsa-miR-590-3p      |
| P30     | CGGAGACTTGGGCAATTG          | hsa-miR-25-5p       |
| P31     | AAACGTGAGGCGCTGCTAT         | hsa-miR-424-3p      |
| P32     | AAGGAGCTCACAGTCTATTGAG      | hsa-miR-28-5p       |
| P33     | AACGCTTCACGAATTTGCGT        | U6                  |

Table S7. Primers used for mRNAs real-time PCR

| Primers | Nucleotide sequence (5'-3') | Amplified fragments |
|---------|-----------------------------|---------------------|
| P1      | AAGCATGTGTTGAACCTCTACC      | HILPDA              |
| P2      | TGTGTTGGCTAGTTGGCTTCT       |                     |
| P3      | GGGTGTGGCGTGTGTTGAATG       | STC2                |
| P4      | TTCCAGCGTTGTGCAGAAAA        |                     |
| P5      | ATGAAGCTGGTTTCCGTCG         | ADM                 |
| P6      | GACATCCGCAGTTCCCTCTT        |                     |
| P7      | TGCCTTGCTGCTCTACCT          | VEGFA               |
| P8      | GACATCCATGAACTTCACCACTT     |                     |
| P9      | CTCCGGGTGGGTTTTTACGAC       | SIK1                |
| P10     | CTGCGTTTTGGTGACTCGATG       |                     |
| P11     | TGTCCGTCAGAACCCATGC         | CDKN1A              |
| P12     | AAAGTCGAAGTTCCATCGCTC       |                     |
| P13     | AAGCCCGAGTGCTCTGAGA         | RARA                |
| P14     | TTCGTAGTGTATTTGCCCAGC       |                     |
| P15     | TCTGGCATTGAGTCTCTGCG        | NFKBIE              |
| P16     | AGGAGCCATAGGTGGAATCAG       |                     |
| P17     | CTTTGACCCTGACTATGTTGGC      | CSPG4               |
| P18     | TGCAGGCGTCCAGAGTAGA         |                     |
| P19     | GCCACAGATTCCCTGTACCTG       | ITPRIP              |
| P20     | TCCCTGAACGGAAGTTGATCTT      |                     |
| P21     | GTAGCAGCCGCAGTCATAA         | ICAM1               |
| P22     | GCCTGTTGTAGTCTGTATTTCTTG    |                     |
| P23     | CCAACGTGACGGACTTCCC         | LIF                 |
| P24     | TACACGACTATGCGGTACAGC       |                     |
| P25     | TGGAGCCCGTATCCTGGAG         | EFNB1               |
| P26     | TTGGGGTCGAGAACTGTGCTA       |                     |
| P27     | ATGCCCTGTATCCAAGCCC         | NR4A1               |
| P28     | GTGTAGCCGTCCATGAAGGT        |                     |
| P29     | TGGGGCTTCCGTATCACAG         | PDLIM2              |
| P30     | CTCTGGCGGATCTTGCTCT         |                     |
| P31     | GGCAGGGGCAGTTACAAAAC        | TEX13B              |
| P32     | CTGTTCCCTTGAGTCCGTCAG       |                     |
| P33     | TGCCTCCTGCACCACCAACT        | GAPDH               |
| P34     | CGCCTGCTTCACCACCTTC         |                     |
